# Supplementary material for: Expression profile and prognostic values of Chromobox family members in human glioblastoma
Source: publisher site journal article supplement (doi:10.18632/aging.203912), 2022-02-24
Supplement: Supplementary file [file aging-v14i4-203912-supplementary-material-SD1.pdf]

## SUPPLEMENTARY FIGURES

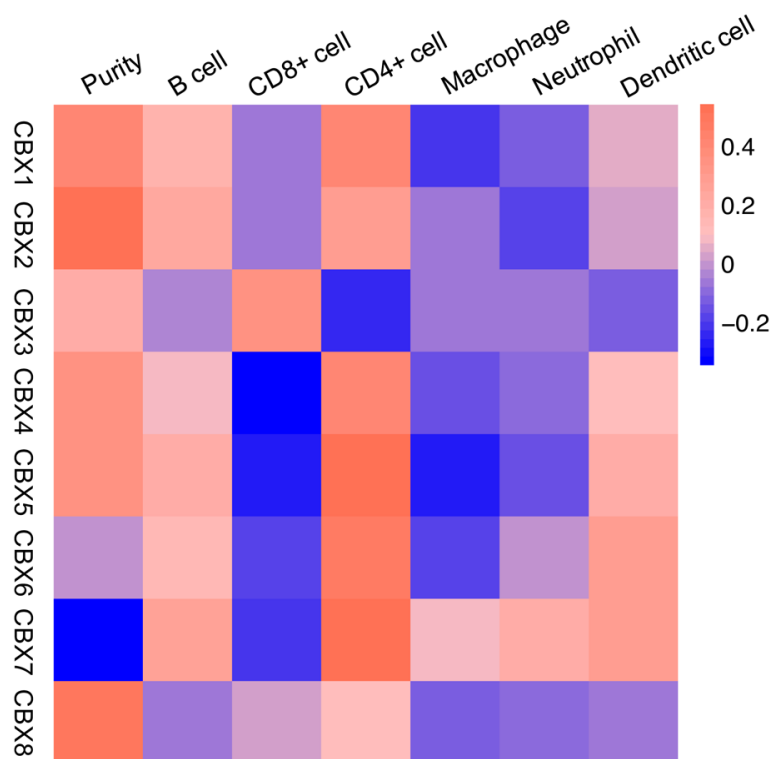

Supplementary Figure 1. The heat map showed the correlations between CBXs and immune cell infiltration.

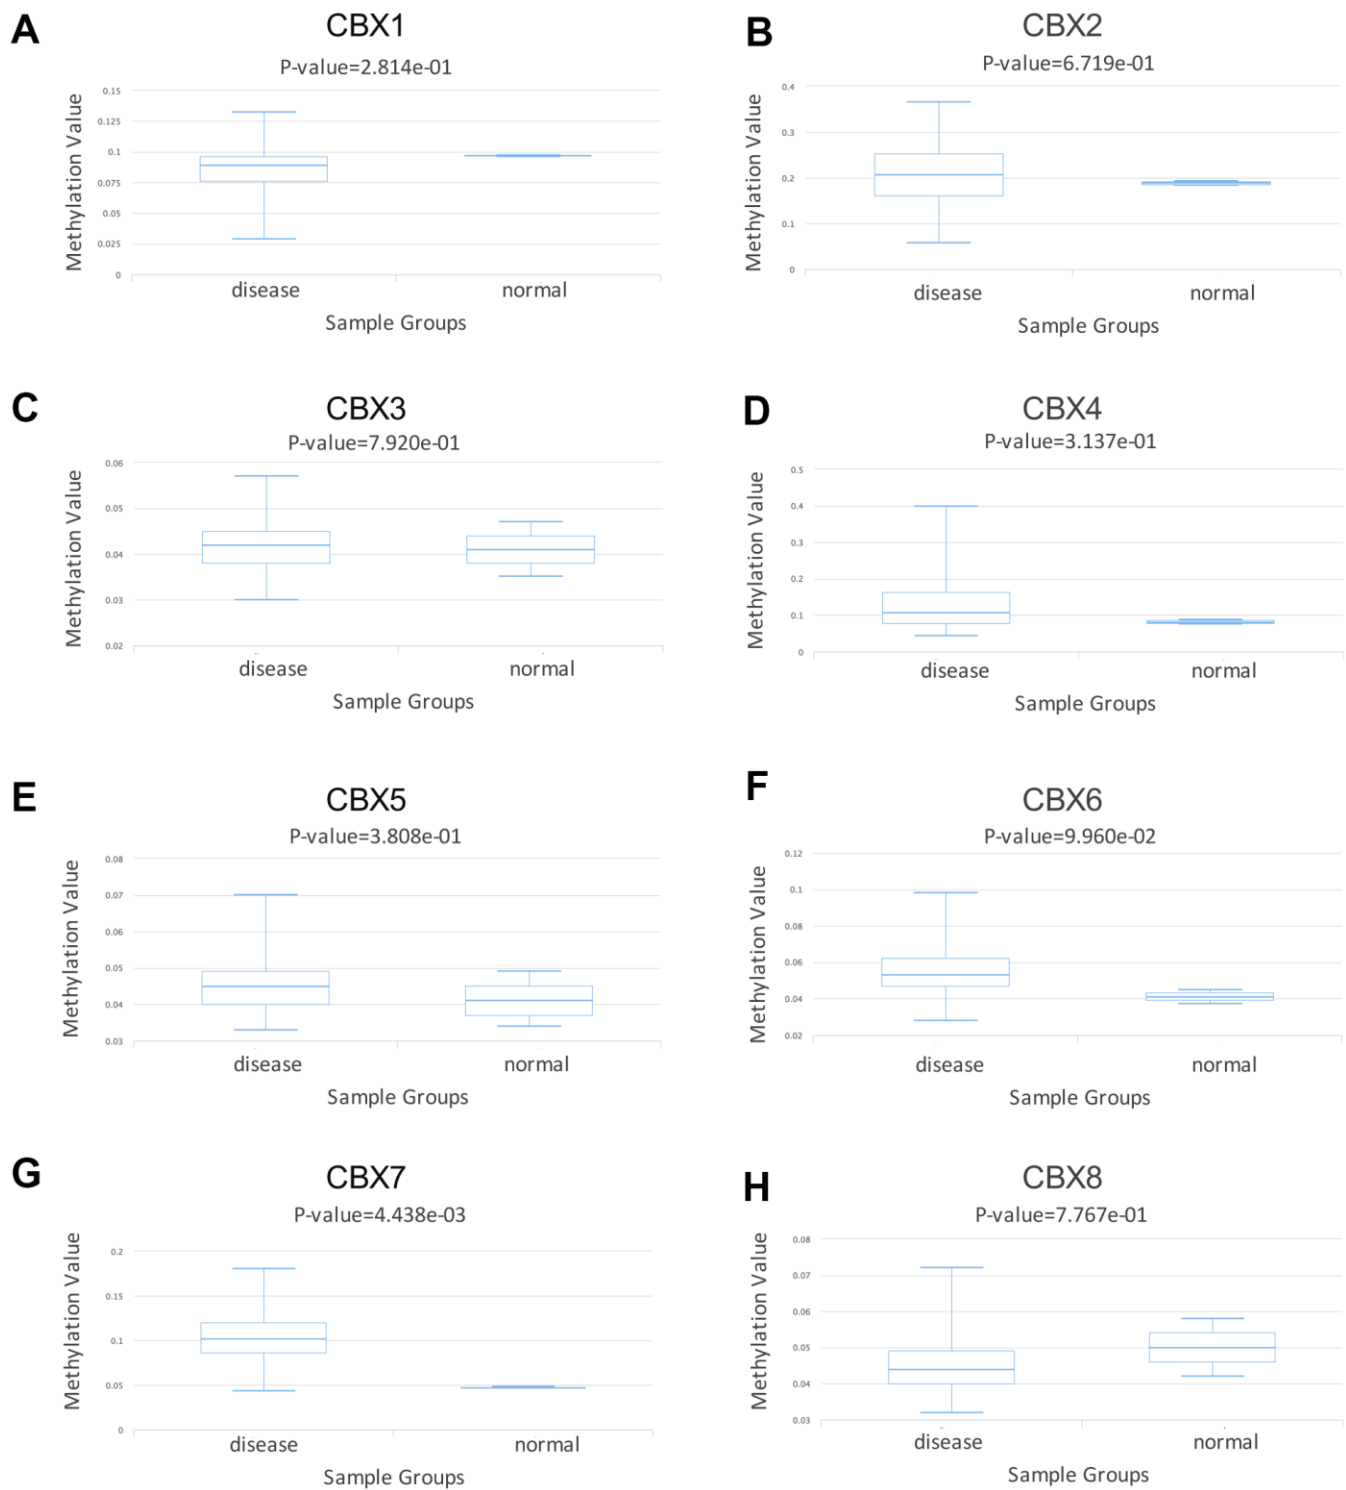

**Supplementary Figure 2. DNA methylation levels of CBXs in GBM (DiseaseMeth).** (A–H) The DNA methylation values of eight CBX members in GBM tissues and normal tissues.
